# Supplementary material for: C1orf64 is a novel androgen receptor target gene and coregulator that interacts with 14-3-3 protein in breast cancer
Source: PubMed Central journal article supplement (PMC5593696; doi:10.18632/oncotarget.17826), 2017-05-11
Supplement: oncotarget-08-57907-s002.pdf [file oncotarget-08-57907-s002.pdf]

**Supplementary Table 1 (B). A list of highly co-expressed genes with AR in study-2.** All listed genes have an absolute correlation coefficient  $|CCI| \geq 0.6$  with AR expression at a  $p < 0.001$  in study-2. The corresponding correlation coefficient and p value for each gene in the list, which is also present in study-1, are shown.

| Gene      | CC (dataset-2) | p value     | CC (dataset-1) | p value     |
|-----------|----------------|-------------|----------------|-------------|
| AR        | 1              | $p < 0.001$ | 1              | $p < 0.001$ |
| C1orf64   | 0.737          | $p < 0.001$ |                |             |
| SIDT1     | 0.73           | $p < 0.001$ |                |             |
| RHOH      | 0.693          | $p < 0.001$ | 0.643          | $p < 0.001$ |
| CCDC125   | 0.689          | $p < 0.001$ |                |             |
| LRFN2     | 0.678          | $p < 0.001$ |                |             |
| TBC1D30   | 0.673          | $p < 0.001$ |                |             |
| TFAP2B    | 0.673          | $p < 0.001$ | 0.484          | $p < 0.001$ |
| BCAS1     | 0.662          | $p < 0.001$ | 0.462          | $p < 0.001$ |
| IRX5      | 0.659          | $p < 0.001$ | 0.514          | $p < 0.001$ |
| CACNA1D   | 0.656          | $p < 0.001$ | 0.477          | $p < 0.001$ |
| DOPEY2    | 0.656          | $p < 0.001$ |                |             |
| SPDEF     | 0.655          | $p < 0.001$ | 0.67           | $p < 0.001$ |
| RHOB      | 0.654          | $p < 0.001$ | 0.587          | $p < 0.001$ |
| FOXA1     | 0.644          | $p < 0.001$ | 0.574          | $p < 0.001$ |
| FOXR1     | 0.644          | $p < 0.001$ |                |             |
| SLC9A2    | 0.637          | $p < 0.001$ |                |             |
| TTC6      | 0.631          | $p < 0.001$ |                |             |
| EMP2      | 0.63           | $p < 0.001$ | 0.375          | $p = 0.006$ |
| CREB3L4   | 0.629          | $p < 0.001$ |                |             |
| SLC16A6   | 0.628          | $p < 0.001$ | -0.231         | $p = 0.01$  |
| KIAA1324  | 0.627          | $p < 0.001$ | 0.339          | $p = 0.01$  |
| GGCT      | 0.623          | $p < 0.001$ |                |             |
| DEGS2     | 0.622          | $p < 0.001$ |                |             |
| TRIL      | 0.62           | $p < 0.001$ |                |             |
| REEP6     | 0.615          | $p < 0.001$ |                |             |
| UMODL1    | 0.614          | $p < 0.001$ |                |             |
| HPX       | 0.612          | $p < 0.001$ | 0.493          | $p < 0.001$ |
| GATA3     | 0.61           | $p < 0.001$ | 0.553          | $p < 0.001$ |
| PLEKHF2   | 0.61           | $p < 0.001$ |                |             |
| TFF3      | 0.607          | $p < 0.001$ | 0.401          | $p = 0.003$ |
| GSE1      | 0.605          | $p < 0.001$ |                |             |
| RND1      | 0.605          | $p < 0.001$ |                |             |
| ZG16B     | 0.603          | $p < 0.001$ |                |             |
| TPRN      | 0.602          | $p < 0.001$ |                |             |
| CACFD1    | 0.601          | $p < 0.001$ | 0.485          | $p < 0.001$ |
| SLC9A3R1  | 0.601          | $p < 0.001$ | 0.49           | $p < 0.001$ |
| ATP8A1    | 0.6            | $p < 0.001$ | 0.169          | $p > 0.1$   |
| HMGCS2    | 0.6            | $p < 0.001$ | 0.5            | $p < 0.001$ |
| CMTM7     | -0.603         | $p < 0.001$ |                |             |
| NXN       | -0.604         | $p < 0.001$ |                |             |
| ANXA1     | -0.609         | $p < 0.001$ | -0.425         | $p = 0.002$ |
| CENTD3    | -0.609         | $p < 0.001$ |                |             |
| WIPF1     | -0.609         | $p < 0.001$ |                |             |
| LINC00597 | -0.612         | $p < 0.001$ | -0.332         | $p = 0.016$ |

|               |        |          |        |          |
|---------------|--------|----------|--------|----------|
| AKR1B1        | -0.614 | p< 0.001 | -0.466 | p< 0.001 |
| PIM1          | -0.615 | p< 0.001 | -0.433 | p= 0.001 |
| FHL3          | -0.617 | p< 0.001 | -0.101 | p> 0.1   |
| CAPG          | -0.622 | p< 0.001 | -0.192 | p> 0.1   |
| CAV1          | -0.622 | p< 0.001 | -0.375 | p= 0.006 |
| POPDC3        | -0.624 | p< 0.001 |        |          |
| PRNP          | -0.632 | p< 0.001 | -0.75  | p< 0.001 |
| FYN           | -0.633 | p< 0.001 | -0.375 | p= 0.006 |
| TUBB6         | -0.634 | p< 0.001 |        |          |
| CAV2          | -0.637 | p< 0.001 | -0.516 | p< 0.001 |
| ncRNA miR-221 | -0.639 | p< 0.001 |        |          |
| ANKS6         | -0.641 | p< 0.001 |        |          |
| INPP1         | -0.652 | p< 0.001 | -0.428 | p= 0.002 |
| S100A3        | -0.655 | p< 0.001 | -0.337 | p= 0.015 |
| KIRREL        | -0.661 | p< 0.001 | 0.105  | p> 0.1   |
| ECM2          | -0.663 | p< 0.001 | 0.106  | p> 0.1   |
| IGF2BP2       | -0.664 | p< 0.001 |        |          |
| NAB1          | -0.671 | p< 0.001 | -0.644 | p< 0.001 |
| ETS1          | -0.672 | p< 0.001 | -0.045 | p> 0.1   |
| APOBEC3C      | -0.673 | p< 0.001 |        |          |
| NFIL3         | -0.674 | p< 0.001 | -0.403 | p= 0.003 |
| LARP6         | -0.679 | p< 0.001 |        |          |
| LAMA2         | -0.686 | p< 0.001 | -0.155 | p> 0.1   |

**Supplementary Table 1 (C). A combined list of highly co-expressed genes with AR in two datasets.** All listed genes have an absolute correlation coefficient ICCI values  $\geq 0.6$  with AR expression at a  $p < 0.001$  in at least one dataset. Asterisks indicate genes that are present in both datasets and have a significant CC ( $p < 0.05$ ) with AR. The strongest CC values for these genes are shown.

| Gene (combined) | Correlation Coefficient (CC) |
|-----------------|------------------------------|
| AR              | 1                            |
| C1orf64         | 0.737                        |
| SIDT1           | 0.73                         |
| *F7             | 0.716                        |
| PATZ1           | 0.709                        |
| ZNF205-AS1      | 0.699                        |
| *RHOH           | 0.693                        |
| CCDC125         | 0.689                        |
| NFATC4          | 0.681                        |
| LRFN2           | 0.678                        |
| TBC1D30         | 0.673                        |
| *TFAP2B         | 0.673                        |
| *SPDEF          | 0.67                         |
| *BCAS1          | 0.662                        |
| MXD4            | 0.661                        |
| *IRX5           | 0.659                        |
| *CACNA1D        | 0.656                        |
| DOPEY2          | 0.656                        |
| *RHOB           | 0.654                        |
| *CTNND2         | 0.651                        |
| SLCO2A1         | 0.645                        |
| *FOXA1          | 0.644                        |
| FOXR1           | 0.644                        |
| SGSM3           | 0.638                        |
| SLC9A2          | 0.637                        |
| TP53TG1         | 0.636                        |
| *FGFR4          | 0.634                        |
| PYGO1           | 0.633                        |
| MGAT5           | 0.632                        |
| TTC6            | 0.631                        |
| *EMP2           | 0.63                         |
| CREB3L4         | 0.629                        |
| *SLC16A6        | 0.628                        |
| *KIAA1324       | 0.627                        |
| GGCT            | 0.623                        |
| DEGS2           | 0.622                        |
| PCDHA5          | 0.621                        |
| TRIL            | 0.62                         |
| DALRD3          | 0.616                        |
| REEP6           | 0.615                        |
| SLC9A1          | 0.614                        |
| UMODL1          | 0.614                        |
| IGHM            | 0.612                        |

|               |        |
|---------------|--------|
| *HPX          | 0.612  |
| *GATA3        | 0.61   |
| PLEKHF2       | 0.61   |
| *TFF3         | 0.607  |
| GSE1          | 0.605  |
| RND1          | 0.605  |
| AMBP          | 0.603  |
| ZG16B         | 0.603  |
| TPRN          | 0.602  |
| *CRAT         | 0.601  |
| MVK           | 0.601  |
| *CACFD1       | 0.601  |
| *SLC9A3R1     | 0.601  |
| ATP8A1        | 0.6    |
| *HMGCS2       | 0.6    |
| CMTM7         | -0.603 |
| NXN           | -0.604 |
| *BUB1         | -0.609 |
| GART          | -0.609 |
| *ANXA1        | -0.609 |
| CENTD3        | -0.609 |
| WIPF1         | -0.609 |
| STIL          | -0.612 |
| TOP2A         | -0.612 |
| *LINC00597    | -0.612 |
| *GLS          | -0.613 |
| *AKR1B1       | -0.614 |
| *PIM1         | -0.615 |
| FHL3          | -0.617 |
| CAPG          | -0.622 |
| *CAV1         | -0.622 |
| POPDC3        | -0.624 |
| *PGM1         | -0.628 |
| *GALNT2       | -0.63  |
| *FYN          | -0.633 |
| TUBB6         | -0.634 |
| *CAV2         | -0.637 |
| ncRNA miR-221 | -0.639 |
| ANKS6         | -0.641 |
| USP1          | -0.642 |
| PICALM        | -0.649 |
| *INPP1        | -0.652 |
| *EHBP1        | -0.654 |
| *S100A3       | -0.655 |
| KIRREL        | -0.661 |
| TTK           | -0.662 |
| ECM2          | -0.663 |
| IGF2BP2       | -0.664 |
| *NAB1         | -0.671 |

|          |        |
|----------|--------|
| ETS1     | -0.672 |
| APOBEC3C | -0.673 |
| *NFIL3   | -0.674 |
| LARP6    | -0.679 |
| DONSON   | -0.681 |
| LAMA2    | -0.686 |
| *PRNP    | -0.75  |
